# Supplementary material for: Introduction and validation of the Natural Disasters Picture System (NDPS)
Source: PubMed Central journal article supplement (PMC6082542; doi:10.1371/journal.pone.0201942), 2018-08-08
Supplement: pone.0201942.s001.pdf [file pone.0201942.s001.pdf]

## Appendix I

### Picture features

| Natural Hazards |               |                 |              |                      |
|-----------------|---------------|-----------------|--------------|----------------------|
| No.             | Main category | Subcategories   | Kind of view | Specific features    |
|                 |               | Content         |              |                      |
| 1               | Avalanche     | Event           | Long-range   |                      |
| 2               | Avalanche     | Event           | Long-range   |                      |
| 78              | Avalanche     | Event           | Close-range  |                      |
| 79              | Avalanche     | Event           | Close-range  |                      |
| 3               | Earthquake    | Event/Aftermath | Long-range   |                      |
| 4               | Earthquake    | Event/Aftermath | Long-range   |                      |
| 6               | Earthquake    | Event/Aftermath | Long-range   |                      |
| 5               | Earthquake    | Event/Aftermath | Close-range  |                      |
| 80              | Earthquake    | Event/Aftermath | Close-range  |                      |
| 81              | Earthquake    | Event/Aftermath | Close-range  |                      |
| 10              | Fire          | Event           | Close-range  |                      |
| 11              | Fire          | Event           | Long-range   |                      |
| 12              | Fire          | Event           | Long-range   |                      |
| 82              | Fire          | Event           | Close-range  |                      |
| 83              | Fire          | Event           | Close-range  |                      |
| 84              | Fire          | Event           | Long-range   |                      |
| 85              | Fire          | Event           | Close-range  | Firefighters         |
| 86              | Fire          | Event           | Long-range   |                      |
| 87              | Fire          | Event           | Close-range  | Firefighting vehicle |
| 7               | Floods        | Event           | Long-range   |                      |
| 8               | Floods        | Event           | Long-range   |                      |
| 9               | Floods        | Event           | Close-range  |                      |
| 88              | Floods        | Event           | Close-range  | People               |
| 89              | Floods        | Event           | Close-range  |                      |
| 97              | Sea Storm     | Event           | Long-range   |                      |
| 98              | Sea Storm     | Event           | Close-range  |                      |
| 99              | Sea Storm     | Event           | Close-range  | People               |
| 13              | Hurricane     | Aftermath       | Long-range   |                      |
| 14              | Hurricane     | Aftermath       | Long-range   |                      |
| 15              | Hurricane     | Aftermath       | Long-range   |                      |
| 16              | Hurricane     | Aftermath       | Long-range   |                      |
| 90              | Hurricane     | Aftermath       | Close-range  | High-impact loss     |
| 20              | Tornado       | Event           | Long-range   |                      |
| 21              | Tornado       | Event           | Long-range   |                      |
| 22              | Tornado       | Event           | Long-range   |                      |
| 95              | Tornado       | Event           | Long-range   | Buildings            |
| 96              | Tornado       | Event           | Long-range   | Buildings            |
| 91              | Tornado       | Aftermath       | Close-range  | High-impact loss     |
| 92              | Tornado       | Aftermath       | Close-range  | High-impact loss     |
| 23              | Tsunami       | Event           | Close-range  |                      |
| 24              | Tsunami       | Aftermath       | Close-range  |                      |
| 25              | Tsunami       | Aftermath       | Long-range   |                      |
| 26              | Tsunami       | Aftermath       | Long-range   |                      |
| 27              | Typhoon       | Aftermath       | Close-range  |                      |
| 28              | Typhoon       | Aftermath       | Close-range  |                      |
| 29              | Typhoon       | Aftermath       | Close-range  |                      |
| 17              | Landslide     | Event/Aftermath | Long-range   |                      |
| 18              | Landslide     | Event/Aftermath | Long-range   |                      |

---

Natural Hazards

---

| No. | Main category | Subcategories   |              |                   |
|-----|---------------|-----------------|--------------|-------------------|
|     |               | Content         | Kind of view | Specific features |
| 93  | Landslide     | Event/Aftermath | Close-range  |                   |
| 94  | Landslide     | Event/Aftermath | Long-range   |                   |

---

Volcanic Hazards

---

| No. | Main category    | Subcategories |              |                   |
|-----|------------------|---------------|--------------|-------------------|
|     |                  | Content       | Kind of view | Specific features |
| 52  | Lava Flow        | Event         | Close-range  |                   |
| 53  | Lava Flow        | Event         | Long-range   |                   |
| 54  | Lava Flow        | Event         | Long-range   |                   |
| 55  | Lava Flow        | Event         | Long-range   |                   |
| 56  | Lava Flow        | Event         | Close-range  |                   |
| 57  | Lava Flow        | Event         | Long-range   | Lava lake         |
| 58  | Lava Flow        | Event         | Close-range  | Lava lake         |
| 59  | Lava Flow        | Event         | Close-range  |                   |
| 74  | Lava Flow        | Event         | Close-range  | Boulder slide     |
| 104 | Lava Flow        | Event         | Close-range  |                   |
| 105 | Lava Flow        | Event         | Close-range  |                   |
| 106 | Lava Flow        | Event         | Close-range  |                   |
| 120 | Lava Flow        | Event         | Long-range   | City              |
| 121 | Lava Flow        | Event         | Long-range   | Eruption          |
| 100 | Lava Flow        | Event         | Close-range  | People            |
| 101 | Lava Flow        | Event         | Close-range  | People            |
| 102 | Lava Flow        | Event         | Close-range  | People            |
| 103 | Lava Flow        | Event         | Close-range  | People            |
| 127 | Lava Flow        | Event         | Close-range  | Lava fall         |
| 39  | Lava Flow        | Aftermath     | Close-range  |                   |
| 113 | Lava Flow        | Aftermath     | Close-range  |                   |
| 110 | Lava Flow        | Aftermath     | Close-range  |                   |
| 66  | Pyroclastic Flow | Event         | Long-range   |                   |
| 67  | Pyroclastic Flow | Event         | Long-range   |                   |
| 68  | Pyroclastic Flow | Event         | Long-range   |                   |
| 128 | Pyroclastic Flow | Event         | Close-range  |                   |
| 129 | Pyroclastic Flow | Event         | Close-range  |                   |
| 65  | Pyroclastic Flow | Aftermath     | Long-range   |                   |
| 40  | Pyroclastic Flow | Aftermath     | Close-range  |                   |
| 114 | Pyroclastic Flow | Aftermath     | Long-range   |                   |
| 43  | Fumaroles        | Event         | Long-range   |                   |
| 45  | Fumaroles        | Event         | Close-range  |                   |
| 119 | Fumaroles        | Event         | Long-range   | Large degassing   |
| 46  | Geyser           | Event         | Close-range  |                   |
| 47  | Geyser           | Event         | Long-range   |                   |
| 122 | Acid Lake        | Event         | Close-range  |                   |
| 123 | Acid Lake        | Event         | Close-range  |                   |
| 124 | Acid Lake        | Event         | Close-range  |                   |
| 125 | Acid Lake        | Event         | Long-range   |                   |
| 126 | Acid Lake        | Event         | Long-range   |                   |
| 44  | Acid Lake        | Event         | Close-range  | Dallol            |
| 69  | Eruption         | Event         | Long-range   | Volcanic Plume    |
| 115 | Eruption         | Event         | Long-range   | Volcanic Plume    |
| 70  | Eruption         | Event         | Long-range   | Volcanic Plume    |

---



---

Volcanic Hazards

---

| No. | Main category | Subcategories  |              |                       |
|-----|---------------|----------------|--------------|-----------------------|
|     |               | Content        | Kind of view | Specific features     |
| 71  | Eruption      | Event          | Long-range   | Volcanic Plume        |
| 72  | Eruption      | Event          | Close-range  | Volcanic Plume        |
| 118 | Eruption      | Event          | Long-range   | Plume and lightning   |
| 42  | Eruption      | Event          | Long-range   | Phreatic plume        |
| 130 | Eruption      | Event          | Long-range   | Lava flow             |
| 131 | Eruption      | Event          | Long-range   | Strombolian           |
| 116 | Eruption      | Event          | Close-range  | Plume w. people       |
| 117 | Eruption      | Event          | Close-range  | Plume w. people       |
| 35  | Eruption      | Event          | Close-range  | Ballistic projectiles |
| 36  | Eruption      | Event          | Long-range   | Ballistic projectiles |
| 37  | Eruption      | Event          | Long-range   | Ballistic projectiles |
| 73  | Eruption      | Event          | Close-range  | Ballistic projectiles |
| 38  | Eruption      | Event          | Long-range   | Of high intensity     |
| 75  | Eruption      | Event          | Long-range   | Of high intensity     |
| 76  | Eruption      | Event          | Long-range   | Of high intensity     |
| 77  | Eruption      | Event          | Long-range   | Of high intensity     |
| 30  | Eruption      | Event          | Long-range   | Aerial Photo          |
| 31  | Eruption      | Event          | Long-range   | Aerial Photo          |
| 32  | Eruption      | Event          | Long-range   | Aerial Photo          |
| 33  | Eruption      | Event          | Long-range   | Aerial Photo          |
| 34  | Eruption      | Event          | Long-range   | Aerial Photo          |
| 60  | Tephra falls  | Event          | Long-range   | Volcanic plume        |
| 62  | Tephra falls  | Event          | Long-range   | Volcanic plume        |
| 63  | Tephra falls  | Event          | Close-range  | Fall-out              |
| 61  | Tephra falls  | Aftermath      | Close-range  |                       |
| 64  | Tephra falls  | Aftermath      | Long-range   |                       |
| 41  | Tephra falls  | Aftermath      | Close-range  |                       |
| 107 | Tephra falls  | Aftermath      | Close-range  |                       |
| 108 | Tephra falls  | Aftermath      | Close-range  |                       |
| 109 | Tephra falls  | Aftermath      | Close-range  |                       |
| 111 | Tephra falls  | Aftermath      | Close-range  |                       |
| 49  | Lahar         | Event          | Close-range  |                       |
| 50  | Lahar         | Event          | Close-range  |                       |
| 51  | Lahar         | Aftermath      | Long-range   |                       |
| 112 | Lahar         | Aftermath      | Close-range  |                       |
| 48  | Lahar         | Aftermath      | Close-range  |                       |
| 148 | Volcano       | Unprototypical |              |                       |
| 149 | Volcano       | Unprototypical |              |                       |
| 150 | Volcano       | Unprototypical |              |                       |
| 151 | Volcano       | Unprototypical |              |                       |
| 152 | Volcano       | Prototypical   |              |                       |
| 153 | Volcano       | Prototypical   |              |                       |
| 154 | Volcano       | Prototypical   |              |                       |
| 155 | Volcano       | Prototypical   |              |                       |

---

---

Victims

---

| No. | Main category | Subcategories                |              |                   |
|-----|---------------|------------------------------|--------------|-------------------|
|     |               | Content                      | Kind of view | Specific features |
| 132 | Victims       | Survivor removed from rubble | Foreground   |                   |
| 133 | Victims       | Corpse                       | Foreground   |                   |
| 134 | Victims       | Corpse                       | Foreground   |                   |
| 135 | Victims       | Injured individual           | Portrait     |                   |
| 136 | Victims       | Injured individual           | Portrait     |                   |
| 137 | Victims       | Survivor removed from rubble | Foreground   |                   |
| 138 | Victims       | Survivor in rubble           | Foreground   |                   |
| 139 | Victims       | Survivor removed from rubble | Foreground   |                   |
| 140 | Victims       | Hospital                     | Overview     |                   |
| 141 | Victims       | Survivor in rubble           | Foreground   |                   |
| 142 | Victims       | Corpse                       | Foreground   |                   |
| 143 | Victims       | Survivor removed from rubble | Foreground   |                   |
| 144 | Victims       | Injured individual           | Foreground   |                   |
| 145 | Victims       | Injured individual           | Foreground   |                   |
| 146 | Victims       | Injured individual           | Foreground   |                   |
| 147 | Victims       | Corpses                      | Overview     |                   |

---
