# Supplementary material for: Introduction and validation of the Natural Disasters Picture System (NDPS)
Source: PubMed Central journal article supplement (PMC6082542; doi:10.1371/journal.pone.0201942), 2018-08-08
Supplement: pone.0201942.s002.pdf [file pone.0201942.s002.pdf]

## Appendix II

### Summarized form of the instructions given to participants

**Valence:** *Scales making it possible to describe intermediate levels*

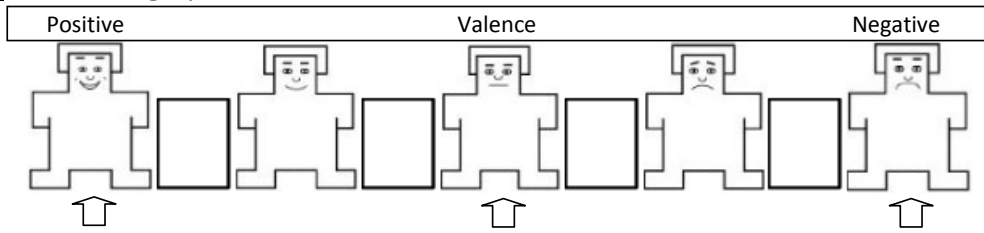

Here, the picture makes you feel cheerful, happy, joyful, content, pleased, hopeful, ...

In the middle, you do not feel any of this; you are in a neutral state.

Here, the picture makes you feel sad, miserable, upset, annoyed, hopeless, ...

**Arousal:** *Scales making it possible to describe intermediate levels*

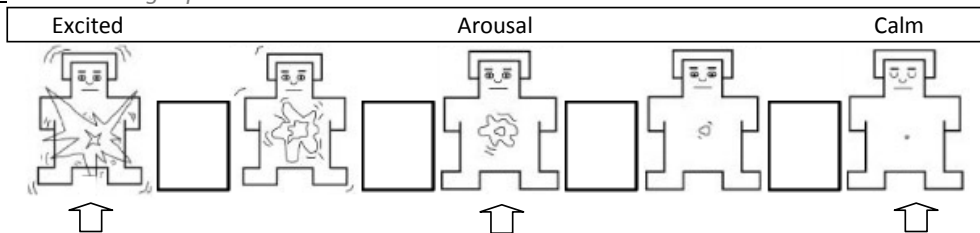

Here, the picture makes you feel excited, in a frenzy, nervous, sharp, awake, ...

In the middle, you do not feel any of this; you are in a neutral state.

Here, the picture makes you feel relaxed, calm, dull, sleepy, ...

**Dominance:** *Scales making it possible to describe intermediate levels*

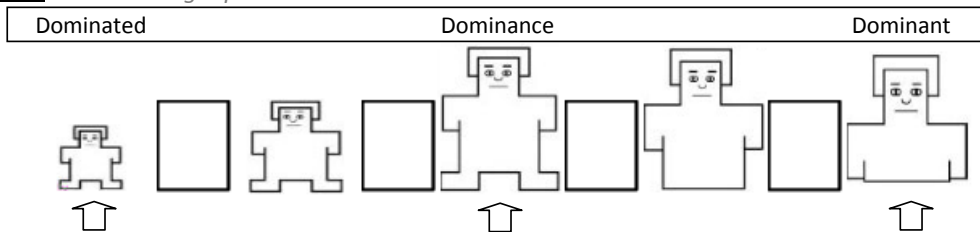

Here, the picture makes you feel that you are dominated; that you do not have any control; that you are under the influence; intimidated, submissive; that you feel small...

In the middle, you do not feel any of this; you are in a neutral state.

Here, the picture makes you feel that you are dominant; that you are in control; that you can influence the event; you are important, independent...

**Certainty:** *Scales making it possible to describe intermediate levels*

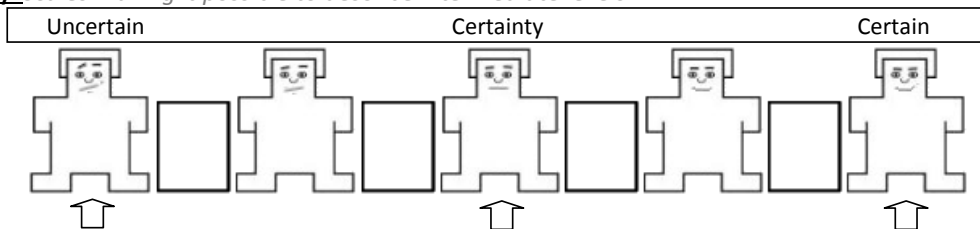

Here, the picture makes you feel that you are uncertain of the situation and its outcome; that you do not know what is going on; that you are doubtful; that you cannot forecast the outcome; that you are unable to anticipate the future.

In the middle, you do not feel any of this; you are in a neutral state.

Here, the picture makes you feel that you are certain of the situation and its outcome; that you know what is going on; that you can forecast the outcome; that you are able to anticipate the future.
