# Supplementary material for: Introduction and validation of the Natural Disasters Picture System (NDPS)
Source: PubMed Central journal article supplement (PMC6082542; doi:10.1371/journal.pone.0201942), 2018-08-08
Supplement: pone.0201942.s003.pdf [file pone.0201942.s003.pdf]

**Appendix III Means and standard deviations for each picture on each dimension**

| No. | Main Category | Valence<br>Mean(SD) | Arousal<br>Mean(SD) | Dominance<br>Mean(SD) | Certainty<br>Mean(SD) | Emotion          | Cluster         | Class                    |
|-----|---------------|---------------------|---------------------|-----------------------|-----------------------|------------------|-----------------|--------------------------|
| 1   | Avalanche     | 5.52(1.91)          | 4.73(1.89)          | 5.27(1.94)            | 5.40(2.04)            | Neutral/Interest | Neutral (B)     | Neutral (III)            |
| 2   | Avalanche     | 5.62(1.87)          | 4.35(1.77)          | 4.76(2.02)            | 5.12(1.95)            | Neutral/Interest | Neutral (B)     | Neutral (III)            |
| 3   | Earthquake    | 2.18(1.38)          | 6.10(2.02)          | 3.10(1.90)            | 4.53(2.26)            | Fear             | Frightening (C) | Aftermath/rubble (VII)   |
| 4   | Earthquake    | 2.87(1.37)          | 5.48(1.86)          | 3.63(1.73)            | 4.55(2.05)            | Fear             | Frightening (C) | Aftermath/rubble (VII)   |
| 5   | Earthquake    | 3.00(1.30)          | 5.27(1.84)          | 4.20(1.98)            | 5.27(2.02)            | Sadness          | Desolation(A)   | Desolation/loss (II)     |
| 6   | Earthquake    | 2.18(1.31)          | 5.98(1.85)          | 3.19(1.95)            | 4.63(2.34)            | Fear             | Frightening (C) | Aftermath/rubble (VII)   |
| 7   | Floods        | 4.03(1.86)          | 4.93(1.67)          | 4.44(1.99)            | 4.82(1.87)            | Sadness          | Desolation (A)  | Desolation/loss (II)     |
| 8   | Floods        | 3.23(1.68)          | 5.33(1.75)          | 3.34(2.11)            | 4.93(2.24)            | Fear             | Frightening (C) | Aftermath/rubble (VII)   |
| 9   | Floods        | 3.42(1.48)          | 5.25(1.56)          | 3.83(1.76)            | 5.12(2.19)            | Sadness          | Desolation (A)  | Desolation/loss (II)     |
| 10  | Fire          | 1.82(1.17)          | 7.70(1.57)          | 1.92(1.49)            | 3.95(2.91)            | Fear             | Frightening (C) | Highly shocking (V)      |
| 11  | Fire          | 2.02(1.50)          | 7.03(1.58)          | 2.36(1.64)            | 3.82(2.84)            | Fear             | Frightening (C) | Shocking (IV)            |
| 12  | Fire          | 2.28(1.62)          | 7.02(1.68)          | 2.58(1.86)            | 4.15(2.89)            | Fear             | Frightening (C) | Shocking (IV)            |
| 13  | Hurricane     | 2.73(1.53)          | 5.67(1.82)          | 3.02(1.61)            | 4.35(2.17)            | Fear             | Frightening (C) | Aftermath/rubble (VII)   |
| 14  | Hurricane     | 2.92(1.48)          | 5.32(2.10)          | 3.83(1.91)            | 4.58(1.88)            | Fear             | Frightening (C) | Aftermath/rubble (VII)   |
| 15  | Hurricane     | 2.88(1.56)          | 6.05(1.97)          | 2.90(1.75)            | 4.13(2.53)            | Fear             | Frightening (C) | Aftermath/rubble (VII)   |
| 16  | Hurricane     | 3.03(1.71)          | 5.65(2.01)          | 2.97(2.00)            | 4.58(2.26)            | Fear             | Frightening (C) | Aftermath/rubble (VII)   |
| 17  | Landslide     | 2.53(1.40)          | 6.27(1.89)          | 2.76(1.88)            | 4.67(2.63)            | Fear             | Frightening (C) | Aftermath/rubble (VII)   |
| 18  | Landslide     | 3.75(1.96)          | 5.30(2.04)          | 3.81(2.06)            | 4.52(2.00)            | Sadness          | Desolation (A)  | Desolation/loss (II)     |
| 20  | Tornado       | 2.68(1.80)          | 6.98(2.03)          | 2.31(1.68)            | 4.23(2.88)            | Fear             | Frightening (C) | Shocking (IV)            |
| 21  | Tornado       | 2.95(1.57)          | 6.53(1.98)          | 2.61(1.52)            | 3.68(2.62)            | Fear             | Frightening (C) | Shocking (IV)            |
| 22  | Tornado       | 2.58(1.58)          | 7.10(1.69)          | 2.24(1.63)            | 3.65(2.69)            | Fear             | Frightening (C) | Shocking (IV)            |
| 23  | Tsunami       | 2.18(1.61)          | 7.57(1.62)          | 2.19(1.61)            | 3.77(2.91)            | Fear             | Frightening (C) | Highly shocking (V)      |
| 24  | Tsunami       | 2.38(1.55)          | 5.70(2.08)          | 3.29(1.88)            | 4.42(2.42)            | Fear             | Frightening (C) | Aftermath/rubble (VII)   |
| 25  | Tsunami       | 2.72(1.45)          | 5.30(2.09)          | 3.22(1.73)            | 4.30(2.17)            | Fear             | Frightening (C) | Aftermath/rubble (VII)   |
| 26  | Tsunami       | 2.47(1.43)          | 5.80(2.02)          | 3.29(2.15)            | 4.63(2.28)            | Fear             | Frightening (C) | Aftermath/rubble (VII)   |
| 27  | Typhoon       | 3.58(1.51)          | 5.20(1.95)          | 4.15(1.83)            | 4.67(2.19)            | Sadness          | Desolation (A)  | Desolation/loss (II)     |
| 28  | Typhoon       | 3.32(1.11)          | 5.18(1.60)          | 3.98(1.98)            | 4.63(2.07)            | Sadness          | Desolation (A)  | Desolation/loss (II)     |
| 29  | Typhoon       | 2.82(1.43)          | 6.10(1.70)          | 3.42(1.76)            | 4.47(2.28)            | Fear             | Frightening (C) | Aftermath/rubble (VII)   |
| 30  | Eruption      | 4.02(2.27)          | 5.62(2.24)          | 3.54(2.14)            | 4.15(2.12)            | Sadness          | Desolation (A)  | Desolation/loss (II)     |
| 31  | Eruption      | 3.33(1.84)          | 6.35(1.80)          | 3.17(2.00)            | 3.73(2.27)            | Fear             | Frightening (C) | Volcanic eruption (VIII) |
| 32  | Eruption      | 4.42(1.67)          | 5.48(1.57)          | 4.42(1.87)            | 4.57(2.03)            | Sadness          | Desolation (A)  | Desolation/threat (I)    |
| 33  | Eruption      | 4.70(1.80)          | 4.83(1.93)          | 4.27(2.08)            | 4.33(1.99)            | Sadness          | Desolation (A)  | Desolation/threat (I)    |
| 34  | Eruption      | 3.73(1.47)          | 5.42(1.76)          | 3.68(2.05)            | 4.47(2.17)            | Sadness          | Desolation (A)  | Desolation/loss (II)     |
| 35  | Eruption      | 3.28(1.26)          | 6.08(1.89)          | 3.22(1.58)            | 3.65(1.86)            | Fear             | Frightening (C) | Volcanic eruption (VIII) |
| 37  | Eruption      | 3.62(1.67)          | 5.85(1.55)          | 3.34(1.61)            | 4.20(2.04)            | Sadness          | Desolation (A)  | Desolation/loss (II)     |
| 38  | Eruption      | 2.73(2.09)          | 6.85(1.88)          | 2.49(1.98)            | 3.85(2.75)            | Fear             | Frightening (C) | Shocking (IV)            |
| 39  | Lava Flow     | 2.02(1.47)          | 7.42(1.57)          | 2.25(1.76)            | 4.52(2.83)            | Fear             | Frightening (C) | Highly shocking (V)      |

| No. | Main Category    | Valence<br>Mean(SD) | Arousal<br>Mean(SD) | Dominance<br>Mean(SD) | Certainty<br>Mean(SD) | Emotion          | Cluster         | Class                    |
|-----|------------------|---------------------|---------------------|-----------------------|-----------------------|------------------|-----------------|--------------------------|
| 40  | Pyroclastic Flow | 3.85(1.87)          | 5.33(1.85)          | 4.32(2.10)            | 5.00(2.06)            | Sadness          | Desolation (A)  | Desolation/loss (II)     |
| 41  | Tephra falls     | 3.47(1.50)          | 4.65(1.92)          | 5.12(2.01)            | 5.18(2.35)            | Sadness          | Desolation (A)  | Desolation/loss (II)     |
| 42  | Eruption         | 5.15(1.63)          | 4.67(1.80)          | 4.81(1.62)            | 4.77(1.99)            | Neutral/Interest | Neutral (B)     | Neutral (III)            |
| 43  | Fumarole         | 4.43(1.29)          | 5.08(1.87)          | 4.39(1.90)            | 3.90(1.63)            | Sadness          | Desolation (A)  | Desolation/threat (I)    |
| 44  | Acid Lake        | 4.78(1.88)          | 5.17(2.14)          | 4.44(1.73)            | 3.35(2.04)            | Sadness          | Desolation (A)  | Desolation/threat (I)    |
| 45  | Fumarole         | 3.90(1.41)          | 5.48(1.80)          | 3.90(1.49)            | 3.72(1.79)            | Sadness          | Desolation (A)  | Desolation/loss (II)     |
| 46  | Geyser           | 4.83(1.68)          | 5.47(1.81)          | 4.53(1.80)            | 4.00(2.07)            | Sadness          | Desolation (A)  | Desolation/threat (I)    |
| 47  | Geyser           | 4.37(1.40)          | 5.43(1.68)          | 4.29(1.60)            | 3.75(1.69)            | Sadness          | Desolation (A)  | Desolation/threat (I)    |
| 48  | Lahar            | 2.98(1.58)          | 6.03(1.77)          | 2.98(1.92)            | 4.03(2.28)            | Fear             | Frightening (C) | Aftermath/rubble (VII)   |
| 49  | Lahar            | 4.43(1.49)          | 4.78(1.80)          | 5.00(1.73)            | 4.28(1.94)            | Sadness          | Desolation (A)  | Desolation/threat (I)    |
| 50  | Lahar            | 3.97(1.28)          | 5.37(1.78)          | 3.90(1.64)            | 3.78(1.97)            | Sadness          | Desolation (A)  | Desolation/loss (II)     |
| 51  | Lahar            | 3.38(1.53)          | 5.67(1.76)          | 3.54(2.02)            | 3.87(2.26)            | Sadness          | Desolation (A)  | Desolation/loss (II)     |
| 52  | Lava Flow        | 2.50(1.66)          | 6.78(1.91)          | 2.44(1.74)            | 4.10(2.69)            | Fear             | Frightening (C) | Shocking (IV)            |
| 53  | Lava Flow        | 2.67(1.48)          | 6.68(1.51)          | 2.68(1.82)            | 4.38(2.62)            | Fear             | Frightening (C) | Shocking (IV)            |
| 54  | Lava Flow        | 2.68(1.55)          | 6.63(1.75)          | 2.76(1.99)            | 4.33(2.63)            | Fear             | Frightening (C) | Shocking (IV)            |
| 55  | Lava Flow        | 3.07(1.53)          | 5.93(1.64)          | 3.27(1.86)            | 4.57(2.15)            | Fear             | Frightening (C) | Aftermath/rubble (VII)   |
| 56  | Lava Flow        | 3.08(1.68)          | 6.23(1.65)          | 3.81(2.25)            | 4.33(2.40)            | Fear             | Frightening (C) | Aftermath/rubble (VII)   |
| 57  | Lava Flow        | 3.55(2.30)          | 7.12(1.81)          | 2.61(1.83)            | 2.78(2.36)            | Fear             | Frightening (C) | Volcanic eruption (VIII) |
| 58  | Lava Flow        | 3.68(1.92)          | 6.23(1.84)          | 3.05(1.64)            | 4.02(1.87)            | Fear             | Frightening (C) | Volcanic eruption (VIII) |
| 59  | Lava Flow        | 3.17(1.86)          | 5.97(1.74)          | 3.07(1.74)            | 4.43(2.35)            | Fear             | Frightening (C) | Aftermath/rubble (VII)   |
| 60  | Tephra falls     | 3.72(1.68)          | 5.77(1.79)          | 3.54(1.91)            | 4.13(2.31)            | Sadness          | Desolation (A)  | Desolation/loss (II)     |
| 61  | Tephra falls     | 3.77(1.53)          | 4.23(1.91)          | 4.64(1.90)            | 4.67(1.89)            | Sadness          | Desolation (A)  | Desolation/loss (II)     |
| 62  | Tephra falls     | 4.22(1.66)          | 5.05(1.68)          | 4.10(1.73)            | 4.68(1.87)            | Sadness          | Desolation (A)  | Desolation/loss (II)     |
| 63  | Tephra falls     | 3.42(1.57)          | 5.78(1.98)          | 4.02(2.03)            | 4.10(2.29)            | Sadness          | Desolation (A)  | Desolation/loss (II)     |
| 64  | Tephra falls     | 2.68(1.31)          | 5.38(2.00)          | 3.58(1.83)            | 4.60(2.09)            | Fear             | Frightening (C) | Aftermath/rubble (VII)   |
| 65  | Pyroclastic Flow | 3.90(1.50)          | 4.78(1.66)          | 4.07(1.62)            | 4.50(1.94)            | Sadness          | Desolation (A)  | Desolation/loss (II)     |
| 66  | Pyroclastic Flow | 3.50(1.51)          | 5.72(1.53)          | 3.36(1.74)            | 4.42(2.22)            | Sadness          | Desolation (A)  | Desolation/loss (II)     |
| 67  | Pyroclastic Flow | 3.87(1.55)          | 5.32(1.76)          | 3.81(1.70)            | 4.10(2.09)            | Sadness          | Desolation (A)  | Desolation/loss (II)     |
| 68  | Pyroclastic Flow | 3.38(1.78)          | 6.23(1.92)          | 3.34(1.88)            | 4.10(2.12)            | Fear             | Frightening (C) | Volcanic eruption (VIII) |
| 69  | Eruption         | 4.02(1.88)          | 5.43(1.94)          | 3.61(1.83)            | 4.38(2.21)            | Sadness          | Desolation (A)  | Desolation/loss (II)     |
| 70  | Eruption         | 4.50(1.81)          | 4.72(1.89)          | 4.24(2.05)            | 4.68(2.10)            | Sadness          | Desolation (A)  | Desolation/threat (I)    |
| 71  | Eruption         | 3.80(1.95)          | 5.57(1.75)          | 3.51(1.83)            | 4.22(1.98)            | Sadness          | Desolation (A)  | Desolation/loss (II)     |
| 72  | Eruption         | 3.35(1.79)          | 6.22(1.82)          | 2.97(1.81)            | 4.00(2.36)            | Fear             | Frightening (C) | Volcanic eruption (VIII) |
| 73  | Eruption         | 3.98(1.88)          | 6.20(1.73)          | 2.75(1.61)            | 3.68(2.14)            | Fear             | Frightening (C) | Volcanic eruption (VIII) |
| 74  | Lava Flow        | 3.98(1.69)          | 6.07(1.94)          | 3.65(1.89)            | 3.98(2.23)            | Sadness          | Desolation (A)  | Desolation/loss (II)     |
| 75  | Eruption         | 3.42(1.65)          | 6.10(1.87)          | 2.87(1.60)            | 3.18(1.86)            | Fear             | Frightening (C) | Volcanic eruption (VIII) |
| 76  | Eruption         | 3.50(1.63)          | 5.97(1.77)          | 2.38(1.65)            | 3.47(2.18)            | Fear             | Frightening (C) | Volcanic eruption (VIII) |
| 77  | Eruption         | 3.17(1.40)          | 6.37(1.90)          | 2.43(1.28)            | 3.43(2.21)            | Fear             | Frightening (C) | Volcanic eruption (VIII) |
| 78  | Avalanche        | 3.72(1.98)          | 5.92(2.06)          | 2.43(1.90)            | 3.63(2.50)            | Fear             | Frightening (C) | Volcanic eruption (VIII) |

| No. | Main Category    | Valence<br>Mean(SD) | Arousal<br>Mean(SD) | Dominance<br>Mean(SD) | Certainty<br>Mean(SD) | Emotion          | Cluster         | Class                    |
|-----|------------------|---------------------|---------------------|-----------------------|-----------------------|------------------|-----------------|--------------------------|
| 79  | Avalanche        | 4.32(2.00)          | 5.33(1.97)          | 3.48(2.25)            | 3.93(2.30)            | Sadness          | Desolation (A)  | Desolation/loss (II)     |
| 80  | Earthquake       | 2.60(1.26)          | 5.77(1.87)          | 3.33(1.64)            | 4.40(2.44)            | Fear             | Frightening (C) | Aftermath/rubble (VII)   |
| 81  | Earthquake       | 2.43(1.17)          | 5.87(1.76)          | 3.23(1.88)            | 4.18(2.60)            | Fear             | Frightening (C) | Aftermath/rubble (VII)   |
| 82  | Fire             | 2.27(1.27)          | 6.68(1.82)          | 2.33(1.73)            | 3.70(2.76)            | Fear             | Frightening (C) | Shocking (IV)            |
| 83  | Fire             | 3.68(1.69)          | 5.33(1.87)          | 4.23(2.35)            | 4.45(2.23)            | Sadness          | Desolation (A)  | Desolation/loss (II)     |
| 84  | Fire             | 1.98(1.31)          | 7.55(1.58)          | 1.72(1.24)            | 3.78(3.13)            | Fear             | Frightening (C) | Highly shocking (V)      |
| 85  | Fire             | 2.15(1.40)          | 6.93(1.66)          | 3.10(2.15)            | 4.35(2.75)            | Fear             | Frightening (C) | Aftermath/rubble (VII)   |
| 86  | Fire             | 1.95(1.27)          | 7.12(1.55)          | 1.95(1.42)            | 3.05(2.46)            | Fear             | Frightening (C) | Highly shocking (V)      |
| 87  | Fire             | 2.28(1.15)          | 6.58(1.63)          | 2.80(1.68)            | 3.53(2.38)            | Fear             | Frightening (C) | Shocking (IV)            |
| 88  | Floods           | 2.28(1.12)          | 6.43(1.78)          | 2.30(1.34)            | 3.72(2.42)            | Fear             | Frightening (C) | Shocking (IV)            |
| 89  | Floods           | 2.60(1.42)          | 6.62(1.84)          | 2.02(1.27)            | 3.28(2.27)            | Fear             | Frightening (C) | Shocking (IV)            |
| 90  | Hurricane        | 3.35(1.40)          | 5.48(2.06)          | 3.95(2.01)            | 4.38(2.14)            | Sadness          | Desolation (A)  | Desolation/loss (II)     |
| 91  | Tornado          | 2.83(1.43)          | 5.07(2.07)          | 3.20(1.67)            | 4.38(2.31)            | Fear             | Frightening (C) | Aftermath/rubble (VII)   |
| 92  | Tornado          | 2.47(1.13)          | 5.82(1.94)          | 3.20(1.84)            | 4.70(2.51)            | Fear             | Frightening (C) | Aftermath/rubble (VII)   |
| 93  | Landslide        | 2.55(1.05)          | 5.98(1.83)          | 2.72(1.43)            | 4.30(2.09)            | Fear             | Frightening (C) | Aftermath/rubble (VII)   |
| 94  | Landslide        | 3.65(1.95)          | 5.22(2.23)          | 3.73(2.20)            | 4.27(2.49)            | Sadness          | Desolation (A)  | Desolation/loss (II)     |
| 95  | Tornado          | 1.90(1.20)          | 7.13(1.76)          | 1.55(1.17)            | 3.45(2.90)            | Fear             | Frightening (C) | Highly shocking (V)      |
| 96  | Tornado          | 2.12(1.28)          | 7.07(1.59)          | 1.63(0.99)            | 2.68(2.38)            | Fear             | Frightening (C) | Highly shocking (V)      |
| 97  | Sea Storm        | 5.77(2.23)          | 5.72(2.22)          | 3.50(2.11)            | 4.82(2.05)            | Neutral/Interest | Neutral (B)     | Neutral (III)            |
| 98  | Sea Storm        | 3.30(1.68)          | 6.82(1.62)          | 2.32(1.30)            | 3.90(2.64)            | Fear             | Frightening (C) | Shocking (IV)            |
| 99  | Sea Storm        | 2.90(1.57)          | 6.72(1.81)          | 2.53(1.65)            | 4.05(2.38)            | Fear             | Frightening (C) | Shocking (IV)            |
| 100 | Lava Flow        | 4.57(1.80)          | 5.65(2.00)          | 4.05(2.06)            | 4.60(2.16)            | Sadness          | Desolation (A)  | Desolation/threat (I)    |
| 101 | Lava Flow        | 3.77(1.65)          | 6.07(1.82)          | 3.45(2.08)            | 3.98(2.13)            | Sadness          | Desolation (A)  | Desolation/loss (II)     |
| 102 | Lava Flow        | 4.88(1.80)          | 5.18(1.94)          | 4.75(2.33)            | 5.27(2.43)            | Neutral/Interest | Neutral (B)     | Neutral (III)            |
| 103 | Lava Flow        | 4.65(1.66)          | 5.55(1.86)          | 4.03(2.07)            | 4.45(2.17)            | Sadness          | Desolation (A)  | Desolation/threat (I)    |
| 104 | Lava Flow        | 2.85(1.53)          | 6.78(1.53)          | 2.45(1.47)            | 3.52(2.07)            | Fear             | Frightening (C) | Shocking (IV)            |
| 105 | Lava Flow        | 2.38(1.44)          | 6.77(1.78)          | 2.23(1.52)            | 3.68(2.73)            | Fear             | Frightening (C) | Shocking (IV)            |
| 106 | Lava Flow        | 3.32(1.63)          | 5.95(1.70)          | 2.98(1.78)            | 3.68(2.14)            | Fear             | Frightening (C) | Volcanic eruption (VIII) |
| 107 | Tephra falls     | 4.53(1.98)          | 4.75(1.72)          | 4.25(1.92)            | 4.72(2.29)            | Sadness          | Desolation (A)  | Desolation/threat (I)    |
| 108 | Tephra falls     | 3.35(1.34)          | 4.98(1.80)          | 4.27(2.05)            | 4.92(1.95)            | Sadness          | Desolation (A)  | Desolation/loss (II)     |
| 109 | Tephra falls     | 2.07(1.15)          | 5.88(1.88)          | 3.18(1.52)            | 4.20(2.32)            | Fear             | Frightening (C) | Victims (VI)             |
| 110 | Lava Flow        | 1.95(1.02)          | 5.95(1.98)          | 2.42(1.57)            | 3.73(2.47)            | Fear             | Frightening (C) | Shocking (IV)            |
| 111 | Tephra falls     | 3.82(1.59)          | 4.77(1.87)          | 3.67(1.72)            | 4.87(2.07)            | Sadness          | Desolation (A)  | Desolation/loss (II)     |
| 112 | Lahar            | 2.23(1.06)          | 6.25(1.88)          | 2.37(1.47)            | 3.77(2.23)            | Fear             | Frightening (C) | Shocking (IV)            |
| 113 | Lava Flow        | 2.43(1.14)          | 6.47(1.55)          | 3.20(1.77)            | 4.68(2.43)            | Fear             | Frightening (C) | Aftermath/rubble (VII)   |
| 114 | Pyroclastic Flow | 3.23(1.47)          | 5.07(1.89)          | 3.28(1.58)            | 4.23(2.17)            | Fear             | Frightening (C) | Aftermath/rubble (VII)   |
| 115 | Eruption         | 3.23(1.76)          | 6.10(1.84)          | 2.53(1.42)            | 3.23(1.81)            | Fear             | Frightening (C) | Volcanic eruption (VIII) |
| 116 | Eruption         | 3.50(1.43)          | 5.72(1.74)          | 3.25(1.54)            | 3.62(2.01)            | Fear             | Frightening (C) | Volcanic eruption (VIII) |
| 117 | Eruption         | 3.73(1.80)          | 5.87(1.89)          | 3.07(2.01)            | 3.55(2.27)            | Fear             | Frightening (C) | Volcanic eruption (VIII) |

| No. | Main Category    | Valence<br>Mean(SD) | Arousal<br>Mean(SD) | Dominance<br>Mean(SD) | Certainty<br>Mean(SD) | Emotion           | Cluster                | Class                    |
|-----|------------------|---------------------|---------------------|-----------------------|-----------------------|-------------------|------------------------|--------------------------|
| 118 | Eruption         | 3.12(1.98)          | 7.25(1.69)          | 2.15(1.57)            | 2.83(2.01)            | Fear              | Frightening (C)        | Volcanic eruption (VIII) |
| 119 | Fumaroles        | 3.50(1.60)          | 5.90(1.79)          | 3.12(1.93)            | 3.33(2.16)            | Fear              | Frightening (C)        | Volcanic eruption (VIII) |
| 120 | Lava Flow        | 2.85(1.71)          | 7.13(1.76)          | 2.53(1.70)            | 3.55(2.73)            | Fear              | Frightening (C)        | Shocking (IV)            |
| 121 | Lava Flow        | 2.88(1.54)          | 6.53(1.58)          | 2.65(1.68)            | 3.18(1.89)            | Fear              | Frightening (C)        | Shocking (IV)            |
| 122 | Acid Lake        | 8.18(1.23)          | 2.55(2.26)          | 6.15(2.26)            | 6.60(2.57)            | Aesthetic emotion | Pleasant/aesthetic (D) | Pleasant/aesthetic (IX)  |
| 123 | Acid Lake        | 5.68(2.29)          | 4.23(2.17)          | 4.63(2.25)            | 4.85(2.77)            | Neutral/Interest  | Neutral (B)            | Neutral (III)            |
| 124 | Acid Lake        | 4.83(2.42)          | 4.82(2.09)          | 4.53(2.26)            | 4.55(2.52)            | Sadness           | Desolation (A)         | Desolation/threat (I)    |
| 125 | Acid Lake        | 7.03(1.60)          | 3.53(2.31)          | 5.08(2.10)            | 5.63(2.11)            | Aesthetic emotion | Pleasant/aesthetic (D) | Pleasant/aesthetic (IX)  |
| 126 | Acid Lake        | 7.82(1.55)          | 2.70(2.23)          | 5.38(2.50)            | 6.47(2.17)            | Aesthetic emotion | Pleasant/aesthetic (D) | Pleasant/aesthetic (IX)  |
| 127 | Lava Flow        | 3.00(1.79)          | 7.07(1.57)          | 1.87(1.16)            | 3.52(2.57)            | Fear              | Frightening (C)        | Shocking (IV)            |
| 128 | Pyroclastic Flow | 3.45(1.16)          | 5.52(1.92)          | 3.00(1.48)            | 3.40(1.89)            | Fear              | Frightening (C)        | Volcanic eruption (VIII) |
| 129 | Pyroclastic Flow | 3.23(1.42)          | 6.20(1.74)          | 2.55(1.47)            | 3.28(2.01)            | Fear              | Frightening (C)        | Volcanic eruption (VIII) |
| 130 | Eruption         | 3.43(1.57)          | 6.17(1.62)          | 2.73(1.67)            | 3.77(2.20)            | Fear              | Frightening (C)        | Volcanic eruption (VIII) |
| 131 | Eruption         | 3.92(2.11)          | 6.63(1.98)          | 2.40(1.75)            | 3.70(2.38)            | Fear              | Frightening (C)        | Volcanic eruption (VIII) |
| 132 | Victims          | 2.40(1.83)          | 6.57(1.70)          | 3.53(2.13)            | 4.20(2.44)            | Fear              | Frightening (C)        | Aftermath/rubble (VII)   |
| 133 | Victims          | 1.73(0.97)          | 6.47(2.32)          | 3.13(2.17)            | 4.00(2.76)            | Fear              | Frightening (C)        | Victims (VI)             |
| 134 | Victims          | 1.33(0.63)          | 6.30(2.27)          | 2.28(1.76)            | 4.63(2.97)            | Fear              | Frightening (C)        | Victims (VI)             |
| 135 | Victims          | 1.37(0.66)          | 6.88(1.95)          | 3.20(2.33)            | 4.20(2.55)            | Fear              | Frightening (C)        | Victims (VI)             |
| 136 | Victims          | 1.65(0.94)          | 6.82(1.95)          | 3.32(2.09)            | 3.82(2.17)            | Fear              | Frightening (C)        | Victims (VI)             |
| 137 | Victims          | 2.52(1.77)          | 6.53(1.33)          | 3.62(1.86)            | 4.48(2.32)            | Fear              | Frightening (C)        | Aftermath/rubble (VII)   |
| 138 | Victims          | 2.18(1.17)          | 5.77(1.98)          | 3.58(2.17)            | 4.38(2.35)            | Fear              | Frightening (C)        | Aftermath/rubble (VII)   |
| 139 | Victims          | 2.27(1.35)          | 6.42(1.58)          | 3.47(2.30)            | 4.05(2.57)            | Fear              | Frightening (C)        | Aftermath/rubble (VII)   |
| 140 | Victims          | 1.85(1.39)          | 6.23(2.11)          | 3.15(2.01)            | 3.72(2.51)            | Fear              | Frightening (C)        | Victims (VI)             |
| 141 | Victims          | 1.85(1.12)          | 5.88(1.92)          | 3.17(1.98)            | 3.87(2.45)            | Fear              | Frightening (C)        | Victims (VI)             |
| 142 | Victims          | 1.63(1.02)          | 6.95(1.69)          | 2.93(2.15)            | 3.07(2.35)            | Fear              | Frightening (C)        | Victims (VI)             |
| 143 | Victims          | 2.60(1.51)          | 6.08(1.54)          | 3.95(2.20)            | 4.67(2.58)            | Fear              | Frightening (C)        | Aftermath/rubble (VII)   |
| 144 | Victims          | 1.78(1.28)          | 6.37(1.85)          | 3.18(2.17)            | 3.62(2.73)            | Fear              | Frightening (C)        | Victims (VI)             |
| 145 | Victims          | 2.22(1.21)          | 5.97(1.75)          | 4.20(2.31)            | 4.35(2.48)            | Fear              | Frightening (C)        | Aftermath/rubble (VII)   |
| 146 | Victims          | 2.15(1.25)          | 6.45(1.84)          | 4.32(2.35)            | 4.93(2.19)            | Fear              | Frightening (C)        | Aftermath/rubble (VII)   |
| 147 | Victims          | 1.93(1.23)          | 6.50(1.77)          | 2.45(1.73)            | 3.25(2.41)            | Fear              | Frightening (C)        | Shocking (IV)            |
| 148 | Volcano          | 6.55(2.13)          | 3.60(2.16)          | 4.78(2.41)            | 5.58(2.29)            | Aesthetic emotion | Pleasant/aesthetic (D) | Pleasant/aesthetic (IX)  |
| 149 | Volcano          | 7.17(1.89)          | 2.88(1.97)          | 4.87(2.34)            | 6.03(2.36)            | Aesthetic emotion | Pleasant/aesthetic (D) | Pleasant/aesthetic (IX)  |
| 150 | Volcano          | 4.67(1.74)          | 4.43(1.82)          | 4.20(2.02)            | 4.22(2.17)            | Sadness           | Desolation (A)         | Desolation/threat (I)    |
| 151 | Volcano          | 7.05(1.81)          | 2.67(1.77)          | 5.18(2.51)            | 6.23(2.17)            | Aesthetic emotion | Pleasant/aesthetic (D) | Pleasant/aesthetic (IX)  |
| 152 | Volcano          | 5.63(1.89)          | 3.90(2.00)          | 4.48(2.09)            | 4.52(2.32)            | Neutral/Interest  | Neutral (B)            | Neutral (III)            |
| 153 | Volcano          | 8.08(1.24)          | 2.77(2.14)          | 5.13(2.40)            | 6.53(2.21)            | Aesthetic emotion | Pleasant/aesthetic (D) | Pleasant/aesthetic (IX)  |
| 154 | Volcano          | 7.33(1.58)          | 2.83(2.12)          | 5.32(2.42)            | 6.10(2.26)            | Aesthetic emotion | Pleasant/aesthetic (D) | Pleasant/aesthetic (IX)  |
| 155 | Volcano          | 4.92(1.89)          | 4.62(2.11)          | 4.02(2.02)            | 4.30(2.07)            | Sadness           | Desolation (A)         | Desolation/threat (I)    |
