# Supplementary material for: Introduction and validation of the Natural Disasters Picture System (NDPS)
Source: PubMed Central journal article supplement (PMC6082542; doi:10.1371/journal.pone.0201942), 2018-08-08

## Appendix IV

### Scatter plots for each correlation as a function of the clusters

Correlation between *valence* and *arousal* as a function of classification

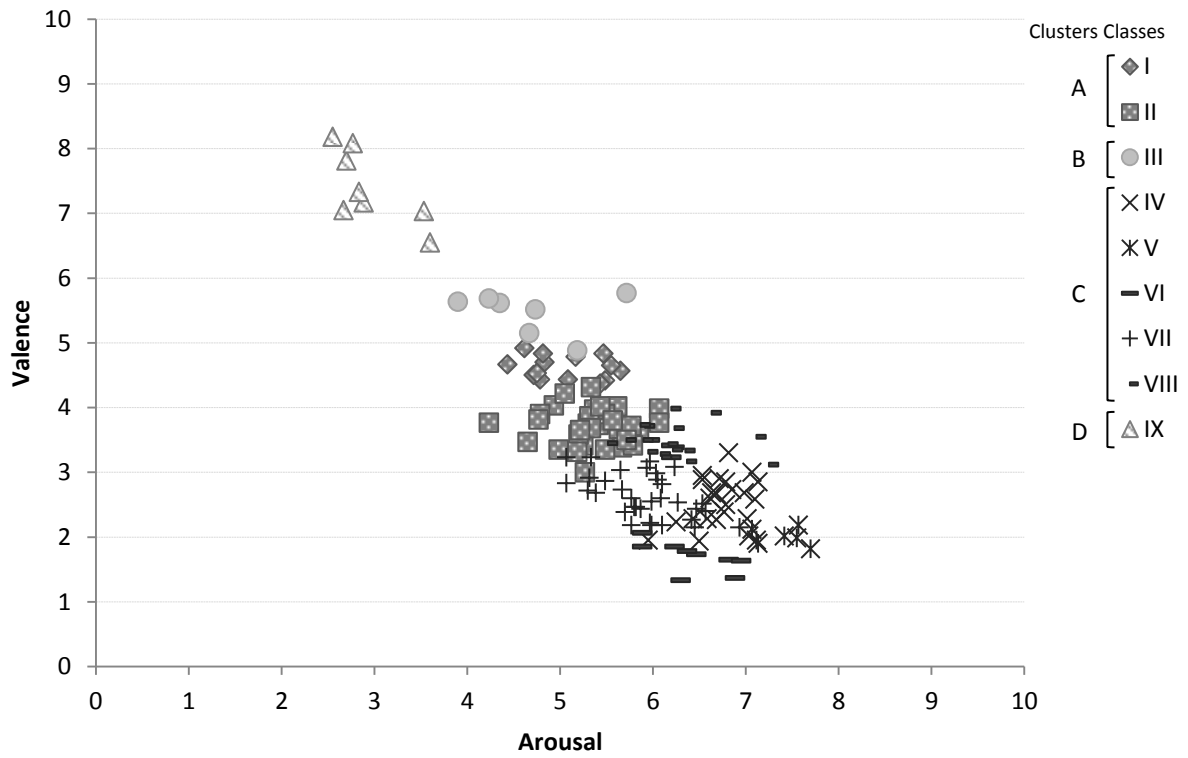

Correlation between *valence* and *dominance* as a function of classification

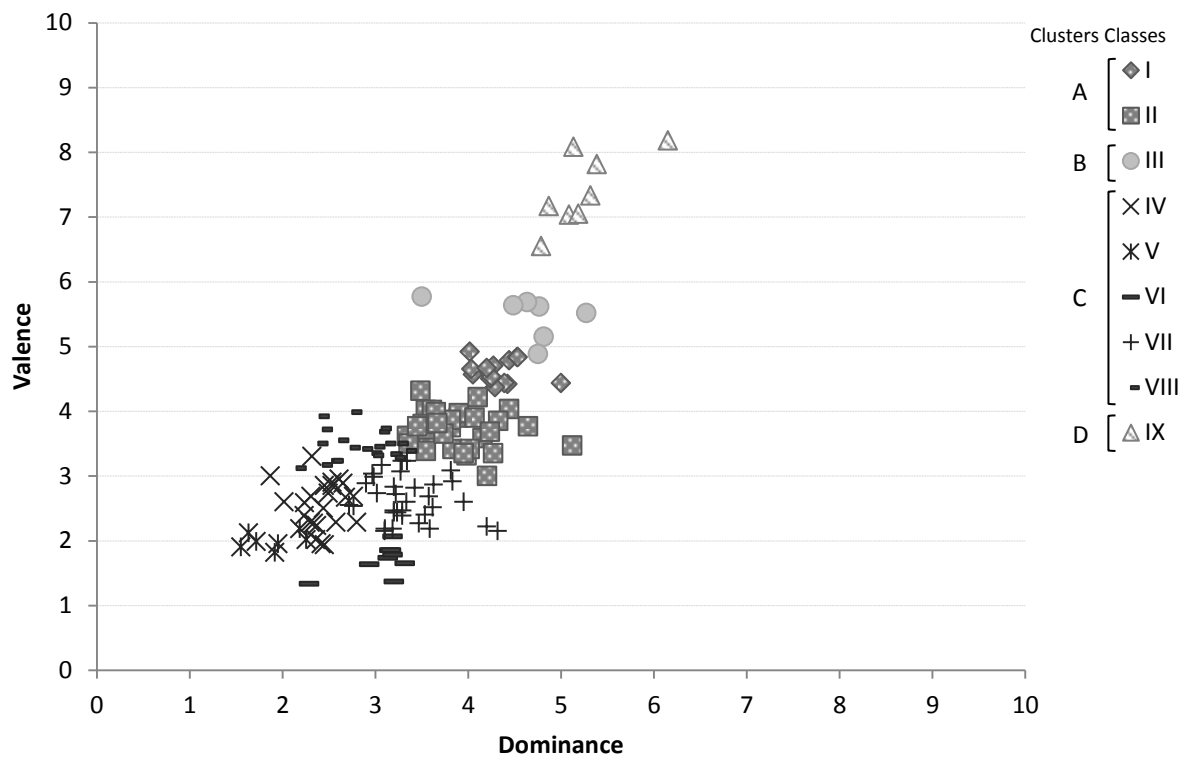

Correlation between *valence* and *certainty* as a function of classification

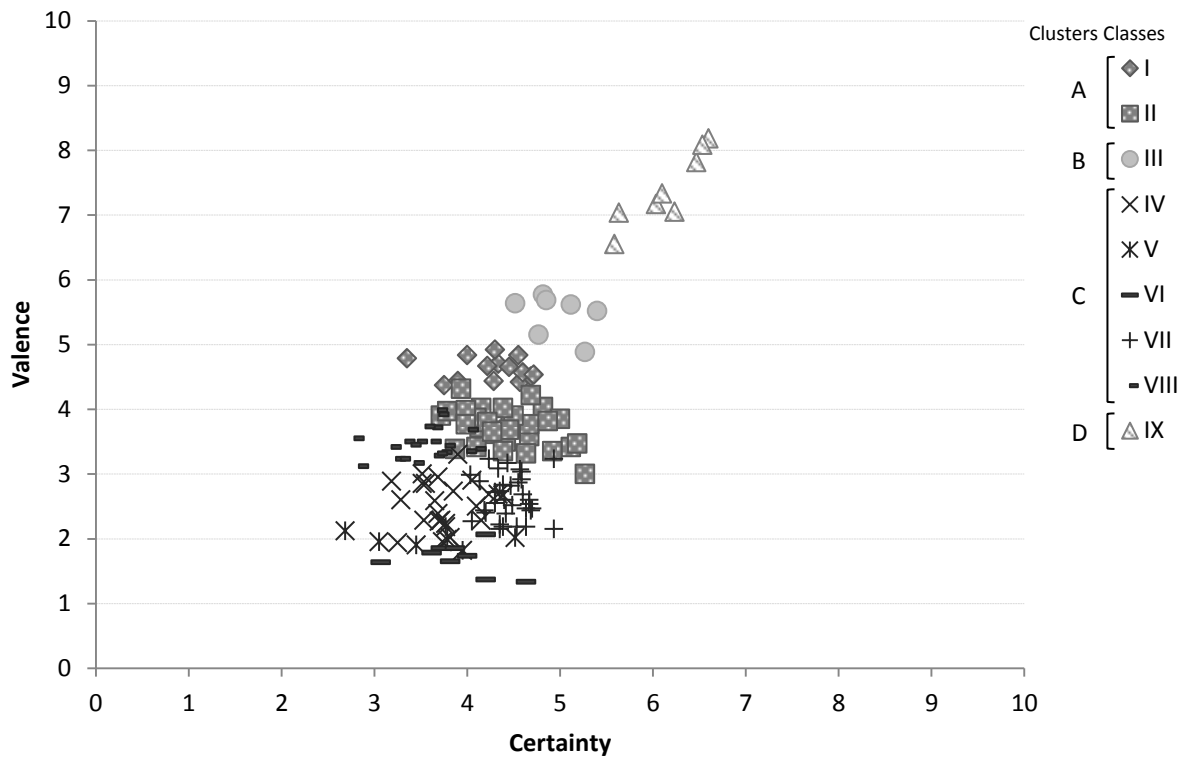

Correlation between *arousal* and *dominance* as a function of classification

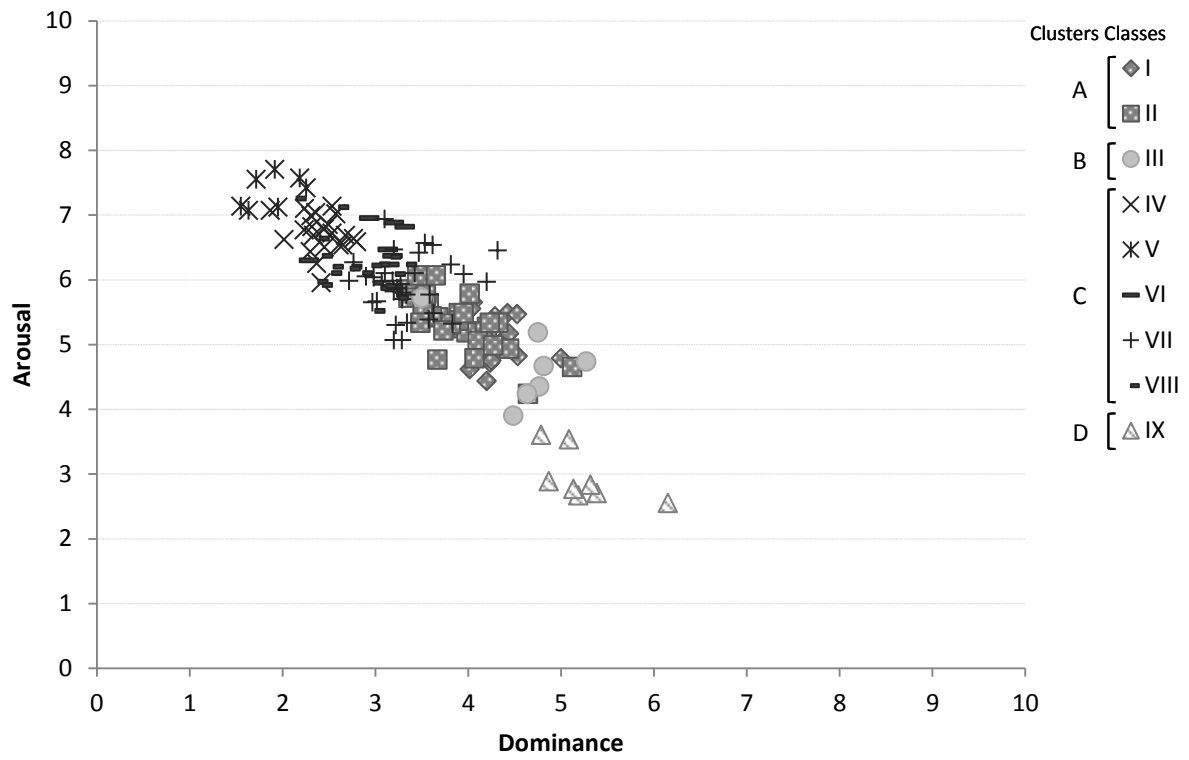

Correlation between *arousal* and *certainty* as a function of classification

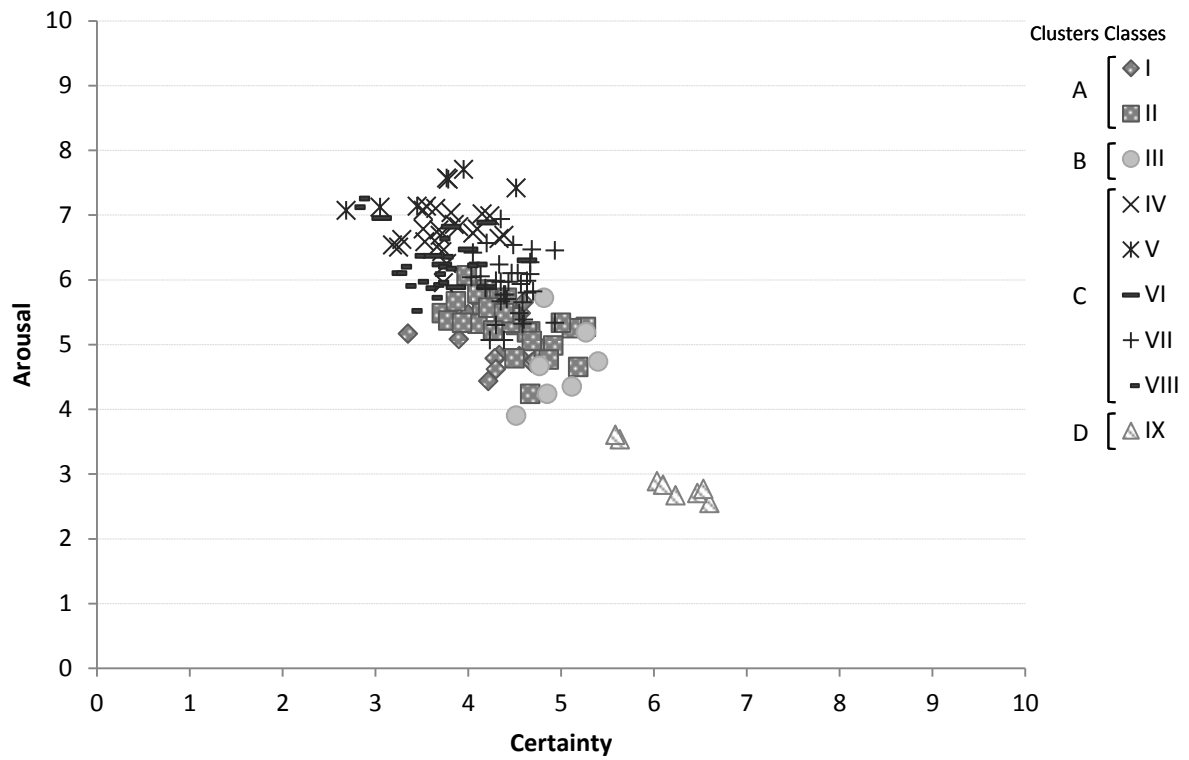

Correlation between *dominance* and *certainty* as a function of classification

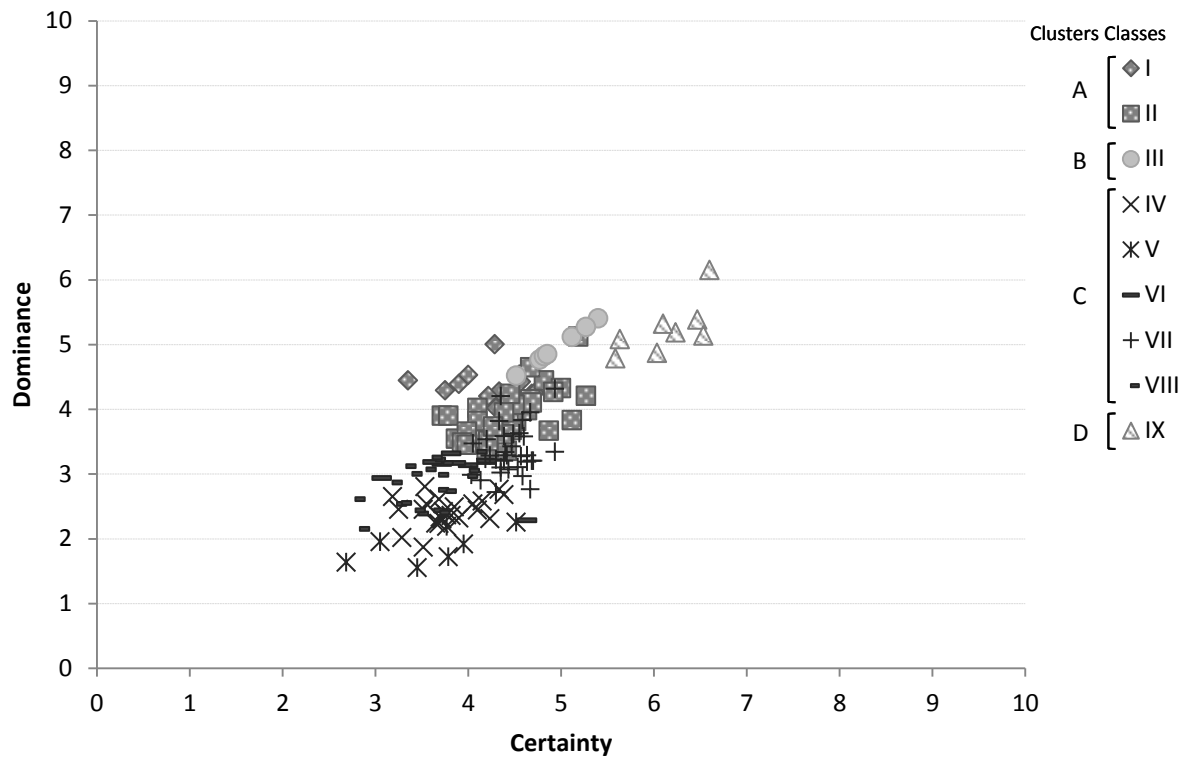

Supplement: pone.0201942.s004.pdf [file pone.0201942.s004.pdf]
